# Supplementary material
Source: PubMed Central journal article supplement (PMC4366794)
Supplement: supp_mol.114.096495_supplemental_96495.pdf [file supp_mol.114.096495_supplemental_96495.pdf]

Smith, T.H., Blume, L.C., Straiker, A. David, B.G., McVoy, J.S., Cox, J.O., Sayers, K.W., Poklis, J.L., Abdullah, R.A., Egertová, M., Chen, C.K., Mackie, K. Elphick, M.R., Howlett, A.C. and Selley, D.E. Cannabinoid receptor interacting protein 1a (CRIP<sub>1a</sub>) modulates CB<sub>1</sub> receptor signaling and regulation. *Molecular Pharmacology*.

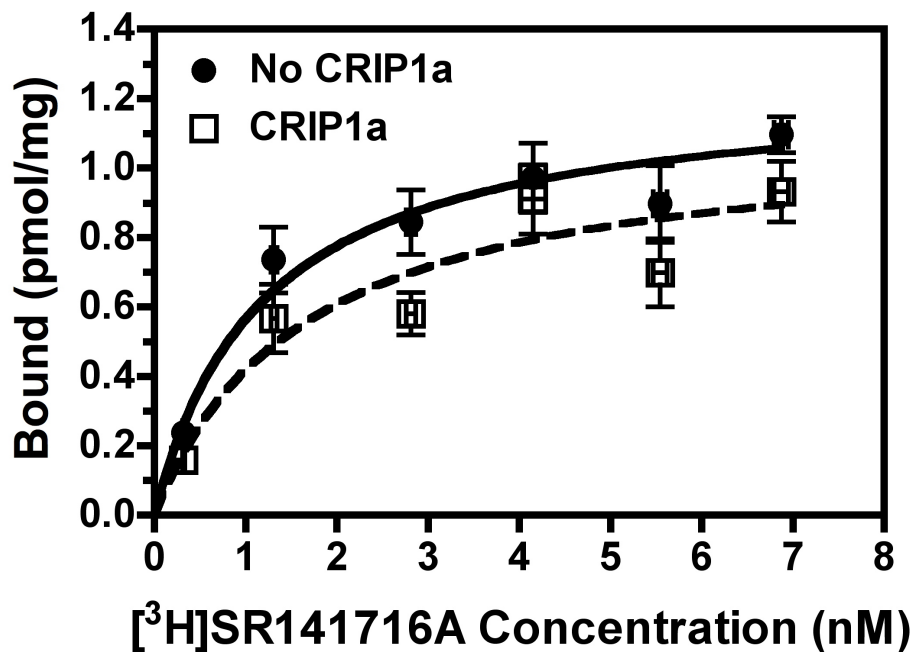

**Supplemental Figure 1.** Effect of CRIP<sub>1a</sub> over-expression on [<sup>3</sup>H]SR141716A saturation binding in CB<sub>1</sub>-HEK cell membranes. Membranes from CB<sub>1</sub>-HEK or CB<sub>1</sub>-HEK-CRIP<sub>1a</sub> cells with were incubated as described in Methods with varying concentrations of [<sup>3</sup>H]SR141716A. Data are mean % stimulation ± SEM (n = 8).

Smith, T.H., Blume, L.C., Straiker, A. David, B.G., McVoy, J.S., Cox, J.O., Sayers, K.W., Poklis, J.L., Abdullah, R.A., Egertová, M., Chen, C.K., Mackie, K. Elphick, M.R., Howlett, A.C. and Selley, D.E. Cannabinoid receptor interacting protein 1a (CRIP<sub>1a</sub>) modulates CB<sub>1</sub> receptor signaling and regulation. *Molecular Pharmacology*.

Lane: 1 2 3 4 5 6 7 8 9 10

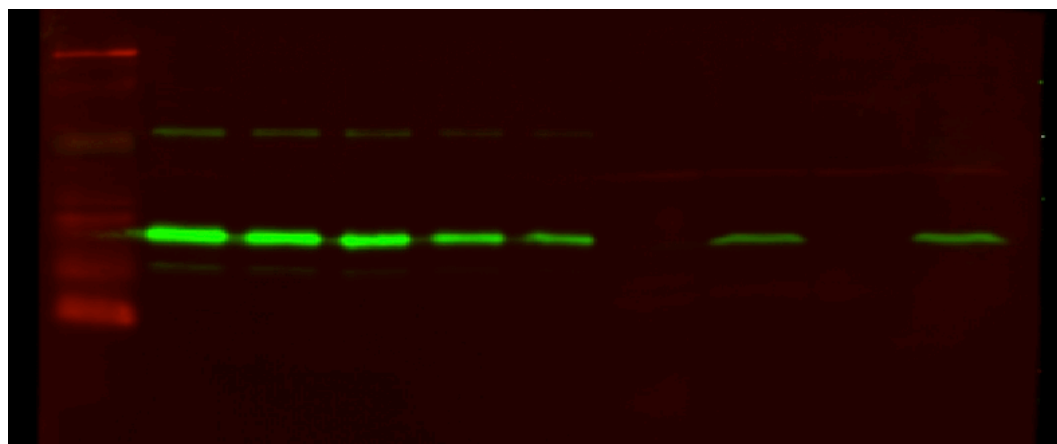

100 75 50 25 10 - Cr + Cr - Cr + Cr  
Purified CRIP<sub>1a</sub> (ng) CB<sub>1</sub>-HEK membranes

**Supplemental Figure 2.** Representative quantitative immunoblot of CRIP<sub>1a</sub> protein. Lane 1: molecular weight marker. Lanes 2 - 6: purified CRIP<sub>1a</sub>. Lanes 7 and 8: membranes from CB<sub>1</sub>-HEK cells without transfected CRIP<sub>1a</sub> (- Cr). Lanes 8 and 10: membranes from CB<sub>1</sub>-HEK cells with stably transfected CRIP<sub>1a</sub> (+ Cr).

Smith, T.H., Blume, L.C., Straiker, A. David, B.G., McVoy, J.S., Cox, J.O., Sayers, K.W., Poklis, J.L., Abdullah, R.A., Egertová, M., Chen, C.K., Mackie, K. Elphick, M.R., Howlett, A.C. and Selley, D.E. Cannabinoid receptor interacting protein 1a (CRIP<sub>1a</sub>) modulates CB<sub>1</sub> receptor signaling and regulation. *Molecular Pharmacology*.

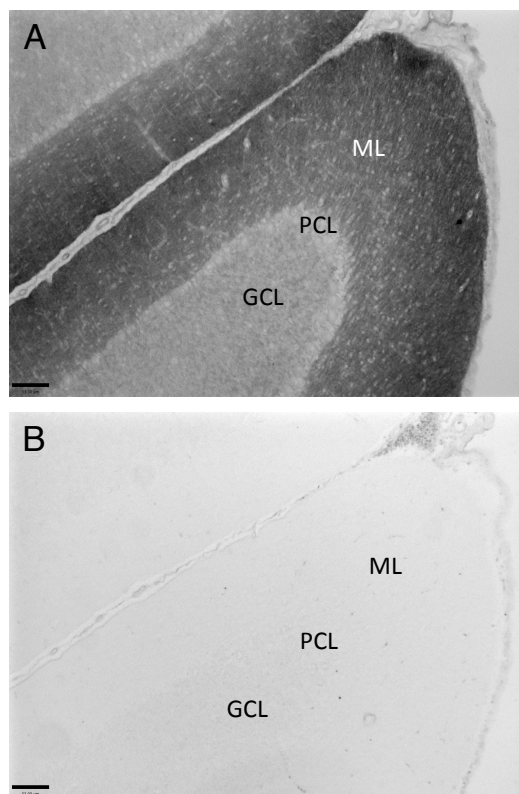

**Supplemental Figure 3.** CRIP<sub>1a</sub>-immunoreactivity in the rat cerebellar cortex is abolished by pre-absorption of 077.2 CRIP<sub>1a</sub> rabbit antiserum with antigen peptide. A. CRIP<sub>1a</sub> immunoreactivity in the molecular layer (ML) and granule cell layer (GCL) of the cerebellar cortex; the Purkinje cell layer (PCL) contains little or no immunostaining. B. CRIP<sub>1a</sub>-immunostaining as seen in (A) is abolished by pre-absorption of the CRIP<sub>1a</sub> antiserum with 20  $\mu$ M of the antigen peptide, KPNETRSLMWVNKESFL (C-terminal region of CRIP<sub>1a</sub>). Scale bar = 33  $\mu$ m.

Smith, T.H., Blume, L.C., Straiker, A. David, B.G., McVoy, J.S., Cox, J.O., Sayers, K.W., Poklis, J.L., Abdullah, R.A., Egertová, M., Chen, C.K., Mackie, K. Elphick, M.R., Howlett, A.C. and Selley, D.E. Cannabinoid receptor interacting protein 1a (CRIP<sub>1a</sub>) modulates CB<sub>1</sub> receptor signaling and regulation. *Molecular Pharmacology*.

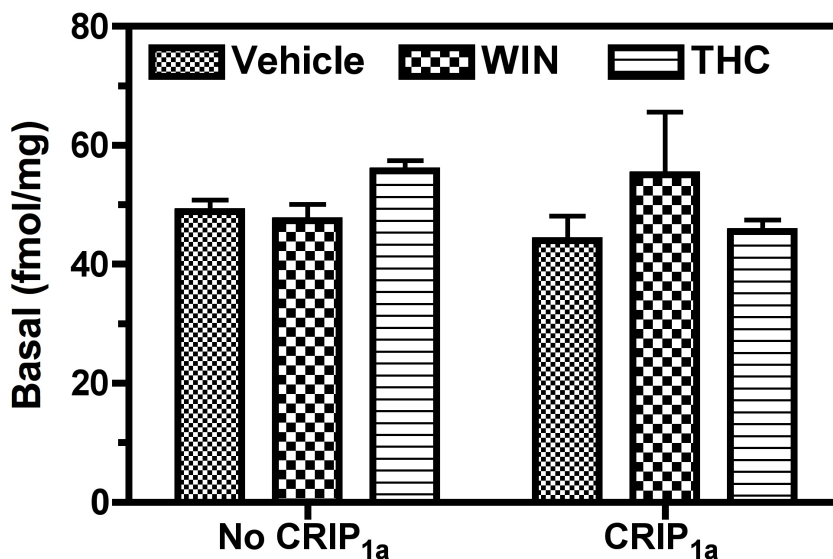

**Supplemental Figure 4.** Ligand pretreatment of CB<sub>1</sub>-HEK and CB<sub>1</sub>-HEK-CRIP<sub>1a</sub> cells does not alter basal [<sup>35</sup>S]GTPγS binding. Cells were pretreated for 4 hr with 10 μM WIN55,212-2, 6 μM THC or vehicle. Membranes were incubated as described in Methods with 100 mM NaCl, 10 μM GDP, 0.1 nM [<sup>35</sup>S] GTPγS. Data are mean [<sup>35</sup>S]GTPγS binding (fmol/mg) ± SEM (n = 4).

Smith, T.H., Blume, L.C., Straiker, A. David, B.G., McVoy, J.S., Cox, J.O., Sayers, K.W., Poklis, J.L., Abdullah, R.A., Egertová, M., Chen, C.K., Mackie, K. Elphick, M.R., Howlett, A.C. and Selley, D.E. Cannabinoid receptor interacting protein 1a (CRIP<sub>1a</sub>) modulates CB<sub>1</sub> receptor signaling and regulation. *Molecular Pharmacology*.

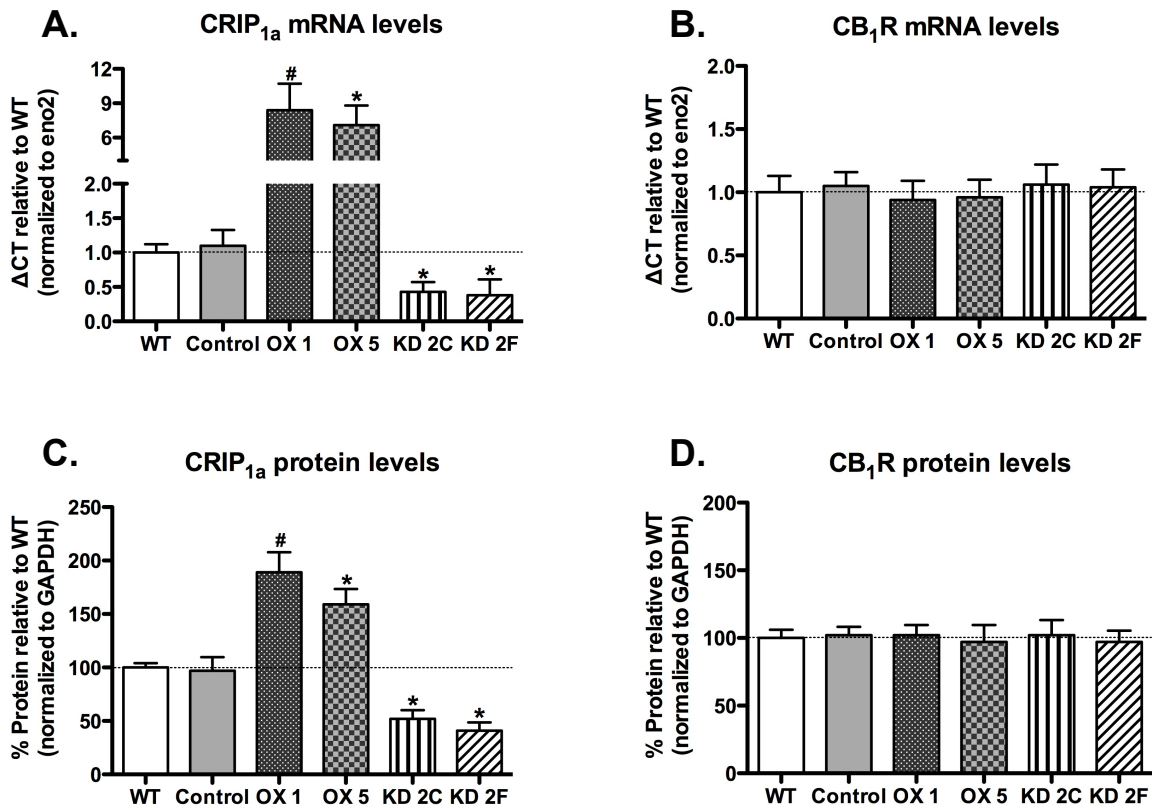

**Supplemental Figure 5.** Effects of stable CRIP<sub>1a</sub> over-expression and knockdown on CRIP<sub>1a</sub> and CB<sub>1</sub>R mRNA and protein levels. **A** and **B**, Quantification of CRIP<sub>1a</sub> (**A**) and CB<sub>1</sub>R (**B**) transcript levels in N18TG2 WT (WT), N18TG2 empty vector (Control), and stable CRIP<sub>1a</sub> over-expression and knockdown clones. qPCR data were normalized to eno2, and relative mRNA abundance was expressed as the difference in CT values, relative to WT (expressed as 1). **C** and **D**, Western blot quantification of CRIP<sub>1a</sub> and CB<sub>1</sub>R protein expression in WT, Control, and stable CRIP<sub>1a</sub> over-expression and knockdown clones. Immunoreactive band densities for CRIP<sub>1a</sub> (**C**) and CB<sub>1</sub>R (**D**) were normalized to GAPDH and expressed relative to WT cells (represented as 100%). qPCR and Western blotting were performed as described in material and methods. qPCR and Western blot data were calculated from three independent experiments, and are expressed as the mean ± S.E.M. \*p<0.05, #p<0.01 indicates significantly different from WT cells using Student's *t*-test.

Smith, T.H., Blume, L.C., Straiker, A. David, B.G., McVoy, J.S., Cox, J.O., Sayers, K.W., Poklis, J.L., Abdullah, R.A., Egertová, M., Chen, C.K., Mackie, K. Elphick, M.R., Howlett, A.C. and Selley, D.E. Cannabinoid receptor interacting protein 1a (CRIP<sub>1a</sub>) modulates CB<sub>1</sub> receptor signaling and regulation. *Molecular Pharmacology*.

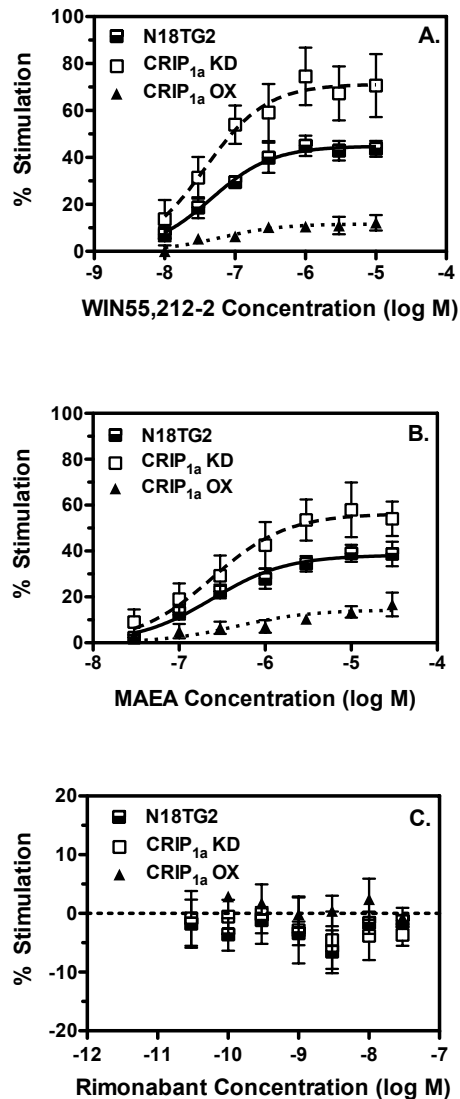

**Supplemental Figure 6.** Effect of CRIP<sub>1a</sub> knockdown and over-expression on concentration-effect curves of ligand-modulated [<sup>35</sup>S]GTP<sub>γ</sub>S binding in N18TG2 neuroblastoma cell membranes. Membranes from wild-type N18TG2 cells or N18TG2 cells with siRNA-mediated knockdown (CRIP<sub>1a</sub>-KD; clone 2F) or overexpression (CRIP<sub>1a</sub>-OX; clone 5) of CRIP<sub>1a</sub> were incubated as described in Methods with 100 mM NaCl, 20 μM GDP, 0.1 nM [<sup>35</sup>S] GTP<sub>γ</sub>S and varying concentrations of WIN55,212-2 (WIN), methanandamide (MAEA) or rimonabant (RIM). Data are mean % stimulation ± SEM (n = 4-9).

Smith, T.H., Blume, L.C., Straiker, A. David, B.G., McVoy, J.S., Cox, J.O., Sayers, K.W., Poklis, J.L., Abdullah, R.A., Egertová, M., Chen, C.K., Mackie, K. Elphick, M.R., Howlett, A.C. and Selley, D.E. Cannabinoid receptor interacting protein 1a (CRIP<sub>1a</sub>) modulates CB<sub>1</sub> receptor signaling and regulation. *Molecular Pharmacology*.

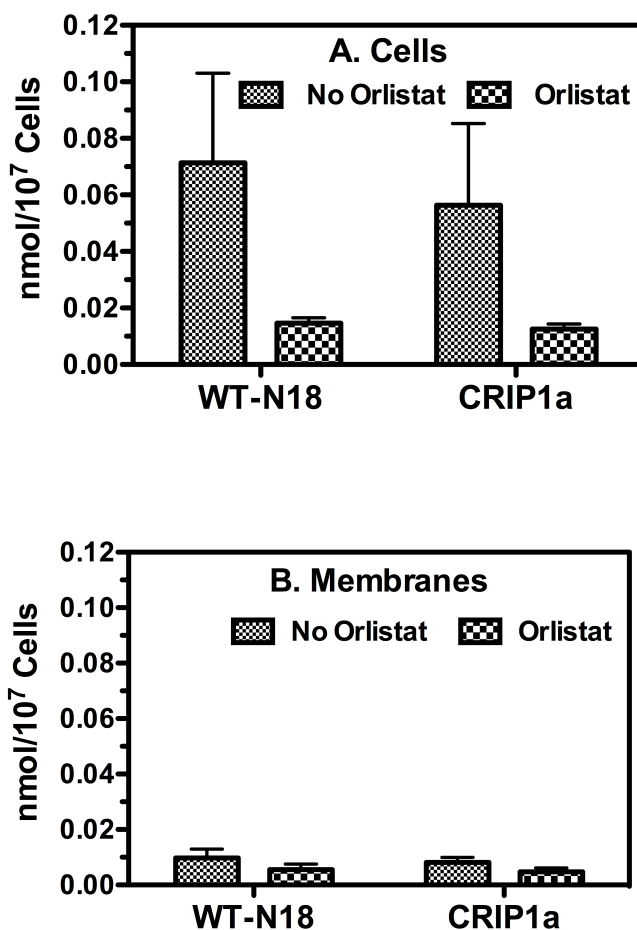

**Supplemental Figure 7.** CRIP<sub>1a</sub> over-expression does not affect orlistat-sensitive 2-AG levels in extracts from N18TG2 cells or membranes. N18TG2 cells with and without stable co-transfection of CRIP<sub>1a</sub> were incubated for 2 hr in 1  $\mu$ M tetrahydrolipstatin (orlistat). Endocannabinoids were extracted from A) intact cells or B) membrane homogenates (as described in Methods). Data are mean nmol/10<sup>7</sup> cells  $\pm$  SEM (n = 5). No CRIP, no transfection of CRIP<sub>1a</sub>; CRIP<sub>1a</sub>, stable transfection of CRIP<sub>1a</sub>.
